# Supplementary material for: “I’m happy to be happy for my baby”: Perceptions of Rx Kids Prenatal and Infant Cash Prescriptions
Source: Research Square preprint supplement (doi:10.21203/rs.3.rs-6907691/v1), 2025-06-30
Supplement: Supplementary file 1 [file 99f69b85c831daa4b507011b.docx]

## **Tables**

**Table 1: Demographic Data Collected at Enrollment**

| Demographic Data | N | % |
| --- | --- | --- |
| Race |  |  |
| Black | 334 | 62.7% |
| White | 161 | 30.2% |
| Biracial | 16 | 3.0% |
| Multi-racial (3 races or more) | 2 | 0.4% |
| American Indian/Native American | 3 | 0.6% |
| Asian | 1 | 0.2% |
| Native Hawaiian/Pacific Islander | 2 | 0.4% |
| Middle Eastern/North African | 0 | 0.0% |
| Other | 14 | 2.6% |
| Ethnicity |  |  |
| Hispanic/Latino | 48 | 9.0% |
| Non-Hispanic/Latino | 485 | 91.0% |
| Age (years) |  |  |
| 15-18 | 27 | 5.1% |
| 19-22 | 82 | 15.4% |
| 23-26 | 136 | 25.5% |
| 27-30 | 114 | 21.4% |
| 31-34 | 107 | 20.1% |
| 35-38 | 44 | 8.3% |
| 39-42 | 18 | 3.4% |
| 43-46 | 4 | 0.8% |
| 51-54 | 1 | 0.2% |
| Income* |  |  |
| 0-10K | 198 | 37.1% |
| 10-20K | 50 | 9.4% |
| 20-30K | 49 | 9.2% |
| 30-40K | 20 | 3.8% |
| 40-50K | 10 | 1.9% |
| 50K or more | 9 | 1.7% |
| Missing | 197 | 37.0% |
| *Question asked “What is your household’s annual income?” Question was only asked to participants > 18 years old. Missing data are in part due to the question being omitted on the first version of the intake form. | | |

**Table 2: Participant Socioeconomic Data at Time of Survey**

| Participant Socioeconomic Data | N | % |
| --- | --- | --- |
| Housing Status |  |  |
| Rent | 296 | 55.5% |
| Own | 75 | 14.1% |
| No stable housing | 3 | 0.6% |
| Move frequently | 21 | 3.9% |
| Live with others | 86 | 16.1% |
| Homeless | 18 | 3.4% |
| Other | 34 | 6.4% |
| Employment |  |  |
| Full-Time | 115 | 21.6% |
| Part-Time | 92 | 17.3% |
| Self-Employed | 21 | 3.9% |
| Contract | 4 | 0.8% |
| Unemployed - not looking | 98 | 18.4% |
| Unemployed - looking | 203 | 38.1% |
| Financial Security |  |  |
| Very insecure | 57 | 10.7% |
| Insecure | 131 | 24.6% |
| Neutral | 131 | 24.6% |
| Secure | 159 | 29.8% |
| Very secure | 55 | 10.3% |

**Table 3: Number of Responses to Open-Ended Questions**

| Open-Ended Questions | N |
| --- | --- |
| Which of the following best describes your current housing situation? - Other | 34 |
| Please think about how you spent the money you received from the program in the past month. Select the three (3) items you spent the most money on in the past month. - Other | 11 |
| What type of financial emergency have you experienced since the program began? - Other | 8 |
| What baby/childcare items have you purchased with your Rx Kids payments, if any? - Other | 13 |
| Which new public benefits have you started to receive since the program began? | 4 |
| Which public benefits did you stop receiving since the program began? - Other | 0 |
| What can make it difficult for you to attend in-person events? - Other | 38 |
| Is there anything Rx Kids and its administrator GiveDirectly can do to make our programs more accessible for you? | 272 |
| What part(s) of the program are you satisfied with? Up to three responses - Other | 8 |
| Can you explain in more detail about parts of the program that you are satisfied with? | 315 |
| What part(s) of the program are you dissatisfied with? - Other | 210 |
| Can you explain in more detail about parts of the program that you are dissatisfied with? Your answer will help us improve our future programming. | 307 |
| Do you have thoughts on how we can improve the mandatory follow-up surveys? | 282 |
| Why did you initially think this program was a scam? - Other | 3 |
| What made you trust that the program was legitimate? - Other | 23 |
| What could Rx Kids do to make you more comfortable with sharing your data? | 46 |
| How have the payments you receive from Rx Kids affected you and your family? - Other | 1 |
| Can you explain in more detail how the payments have affected your physical health? | 102 |
| Can you explain in more detail how the payments have affected your mental health? | 180 |
| When your Rx Kids payments end, what kind of support would be most helpful to you? - Other | 54 |
| What's the best way for you to learn about future programs like Rx Kids? - Other | 12 |
| How will the payments you are receiving now continue to impact you after the program is over? | 282 |
| How has Rx Kids impacted your experience being a new or expecting parent? | 373 |
| How has Rx Kids impacted how you view yourself as a parent? | 363 |
| How has Rx Kids impacted you and your baby? | 365 |
| Is there any other feedback you would like to give about Rx Kids or its administrators? | 302 |
| Total | 3608 |

**Table 4: Responses to Open-Ended Questions by Theme**

| Theme | Sub-Theme | Illustrative Quote |
| --- | --- | --- |
| 1. Financial Stability and Spending | 1.1 Ability to afford household basic needs | *“It's helped me have extra money to be able to get things we need and pay my bill”* |
| 1.2 Ability to meet child(ren)’s needs | “*When I fall short some months, I’ve always been able to use the money from RX KIDS to make sure she has everything she needs”* |
| 1.3 Financial stability/reduced disruptions | *“It has given me security knowing I can financially make ends meet or if I need something unexpected I don't have to worry.”* |
| 1.4 Ability to save/get ahead | *“Setting aside an amount of the money will let [anonymized] be able to succeed later on in life when it comes to it.”* |
| 1.5 Allowed for time off work | *“I was able to take 6 weeks off to spend with my baby after a scary birth situation, and I financially it would not have been able to do that without Rxkids”* |
| 2. Mental Health and Wellbeing | 2.1 Improved mental health | *“I haven't been depressed over having to figure out how to get my baby the things he needs”* |
| *“Makes my anxiety go away knowing I can feed my family”* |
| 2.2 Reduced stress | *“I am able to relax a bit mor[e], knowing I’m getting help.”* |
| 2.3 Increased mental bandwidth | *“Allowing me to focus and care for my children without too much of a financial burden always talking [sic] up mental space.”* |
| 2.4 Sense of ease/peace | *“It’s been a positive experience for me. Because I have peace of mind each month that my daughter will have what she needs or wants”* |
| 2.5 Hope | *“It's given me a little hope that I can provide for my baby during this difficult time until I can be able to go back to work.”* |
| 2.6 Happiness | *“Baby & I are happy and taken care of with extra support from the program.”* |
| 3. Empowerment, Agency, & Community | 3.1 Confidence | *“It's have me confidence in knowing I can provide especially during the 1st year of life”* |
| 3.2 Independence | *“It helped me breathe a bit and not have to beg family and friends”* |
| 3.3 Village of supporters | *“I’m satisfied because nobody has ever done this for me and I really been needing help and this been such a big help for me”* |
| 3.4 Faith in community | *“Gives me hope that the world is changing and that I have a community that cares for me and my family”* |
| 4. Parenting Resources and Perceptions | 4.1 More time to bond with children | *“It has helped me take the time with my baby to just love her”* |
| 4.2 Ability to “provide” for child(ren) | *“Having extra money to proveído [sic] for baby makes me feel great , knowing i can take care of most issues with the extra help”* |
| 4.3 Ability to afford the “extra things” for children | *“Its make me feel like i can give her anything she asks for”* |
| *“It’s helped me knowing my baby has everything she needs plus more”* |
| 4.4 Positive impact on parenting self-efficacy | *“Didn’t stress like I did with my other kids so I have more patience”* |
| *“I get to be a mom and he gets his mommy”* |
| *“I feel confident, smart, patient, and more accessible to be here with my kids.”* |
| 4.5 No noted impact on parenting self-efficacy | *“I already view myself as a great parent, Rx Kids has helped me slightly financially as a parent”* |
| 5. Families’ Physical Health | 5.1 Ability to pay co-pays & for over-the-counter products | *“They have helped me pay with any co pays for medications for my child, me and my boyfriend. The money has also help provide over the counter medicine for my baby when the health problems weren’t serious like nasal spray and etc.”* |
| 5.2 Reduced barriers to breastfeeding | *“It’s allowed me to be able to fully breastfeed my baby, rather than trying to find a new job right away and having to try to pump or use formula.”* |
| 5.3 Time/money to dedicate to maintaining physical health | *“I have been able to get the things I need to impact my physical health”* |
| *“Helps me so I can focus on my high risk pregnancy”* |
| 5.4 Reduced stress improves physical health | *“Less stress on my brain, nerves & body.”* |
| 6. Gratitude | 6.1 Thankfulness | *“Thank you Rx Kids for everything, no preparing to bring a baby into this world with a low income can be very hard but you made it easy for me and my family this helped me spend more time with my baby and enjoy her growing up.”* |
| 6.2 Rx Kids as a blessing | *“I believe this program is a blessing for the community”* |
| 7. Program End | 7.1 Continued positive impact | *“I do want to take the time to thank everyone involved in this program, I think giving a child a great start and giving the mother confidence financially will impact families forever.”* |
| 7.2 No noted impact after program end | *“Once the program is over I won’t be impacted it will have helped me tremendously during the duration of the program.”* |
| 7.3 Need to replace income from Rx Kids | *“I will need to find another form of income to supplement for rx kids but I’m grateful we had it to help us along the way.”* |
| 7.4 Financial challenges anticipated after program end | *“Because then [after program end] I’ll have to figure everything out all over even though it was helpful to me”* |
| 8. Program Extension and Expansion | 8.1 Desire for extended program duration | *“The program is perfect truly a godsend, only wished it last a little longer”* |
| 8.2 Desire for expanded program reach | *“I think that this program should become accessible for all in Michigan as I know people who would love to be apart of the program but do not live in the granted limits.”* |
